# Supplementary material for: Clinicopathological significance of MYL9 expression in pancreatic ductal adenocarcinoma
Source: PubMed Central journal article supplement (PMC9575502; doi:10.1002/cnr2.1582), 2021-11-24
Supplement: CNR2-5-e1582-s001.pdf [file CNR2-5-e1582-s001.pdf]

Fig. S1.

(a)

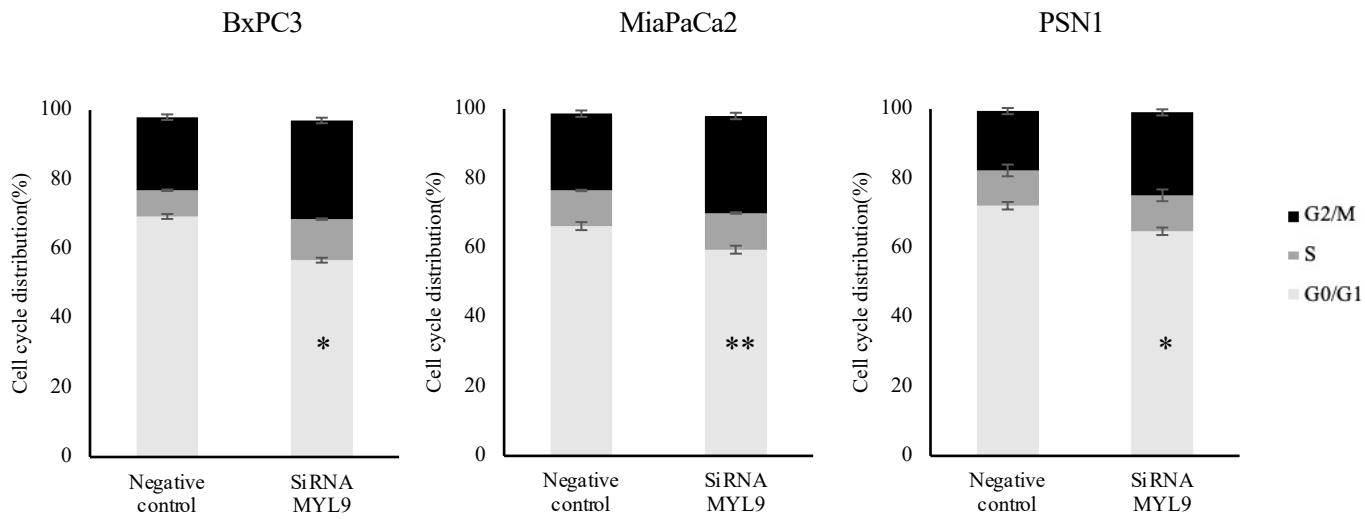

(b)

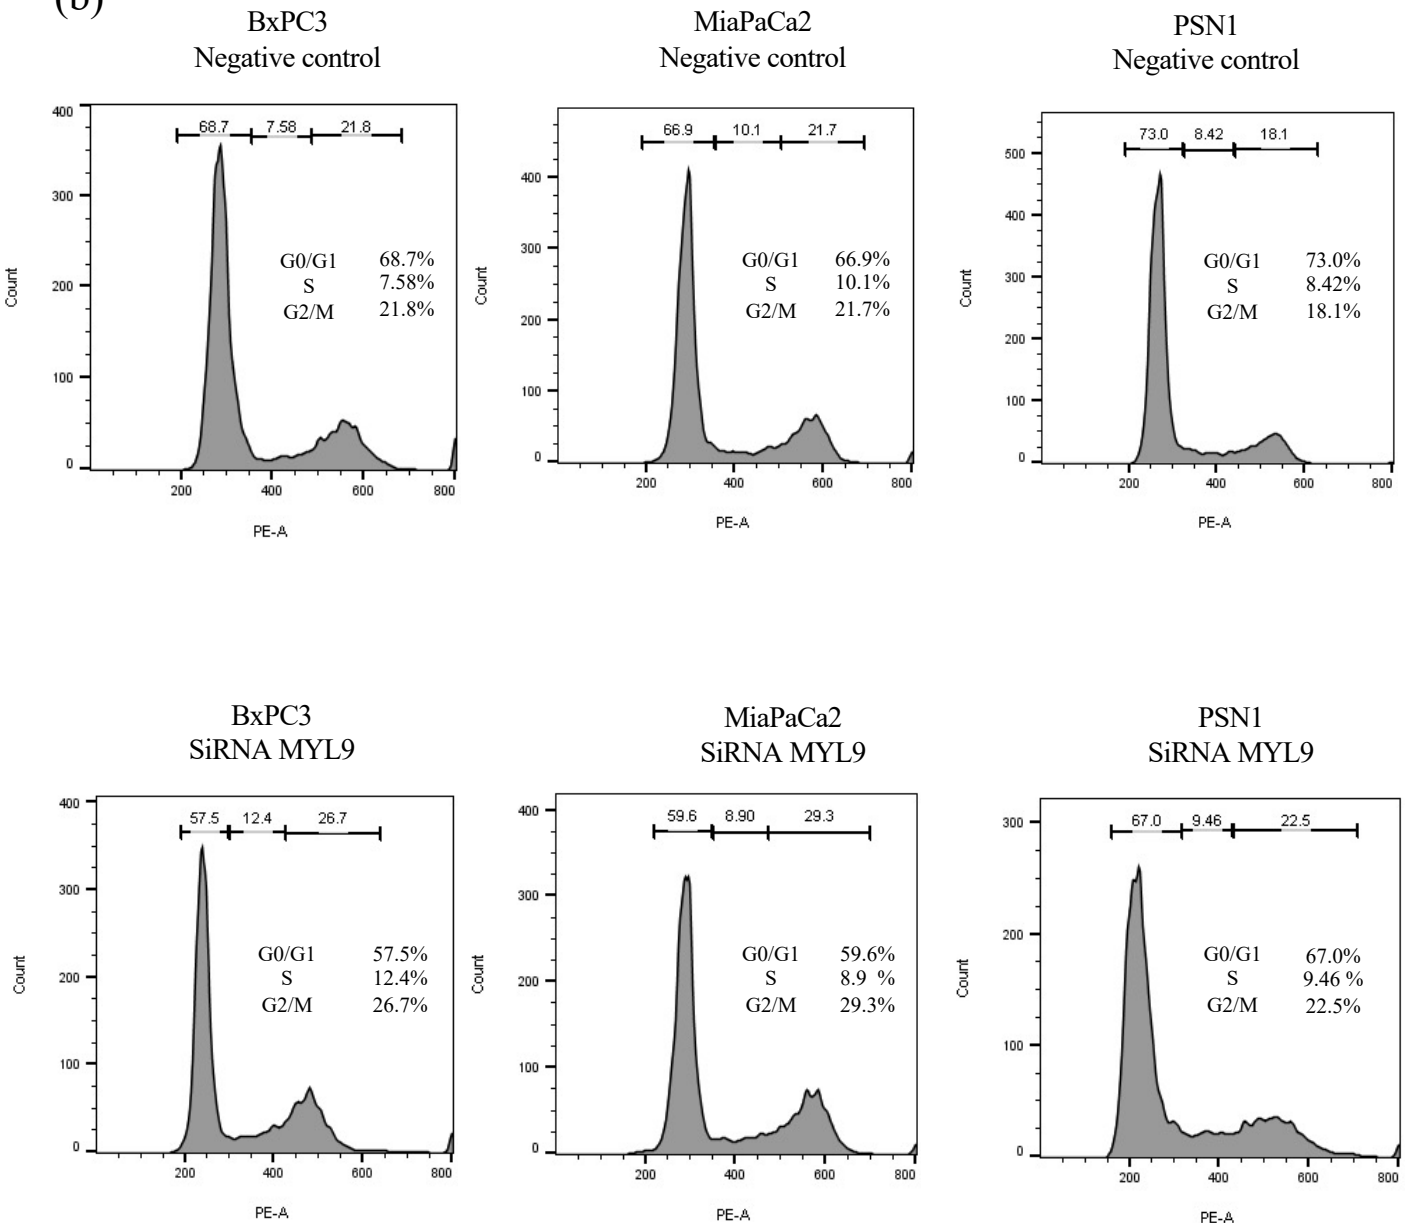

(c)

PSN1

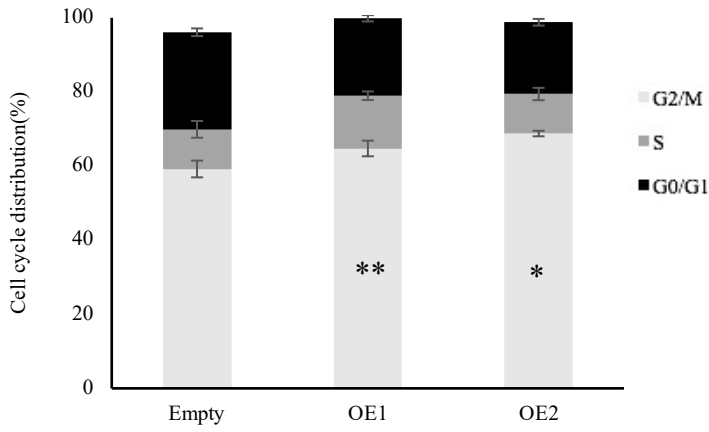

(d)

PSN1  
Empty

PSN1  
OE1

PSN1  
OE2

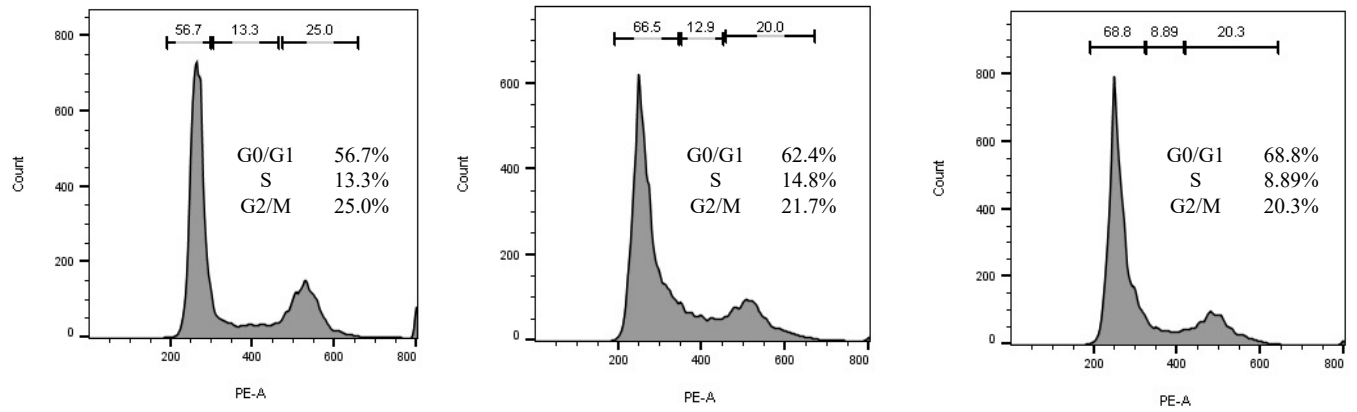

### Supplementary figure 1.

(a,b) PDAC cells transfected with negative control or siRNA against MYL9 were stained with propidium iodide and analyzed through flow cytometry. (c,d) Lentivirus-mediated MYL9 overexpressing or negative control cells were stained with propidium iodide and analyzed using flow cytometry. Significant differences of G0/1 phase were observed between negative control and SiMYL9. (\* $p < 0.05$ , \*\* $p < 0.01$ )
